# Supplementary material for: Vibrational and conformational studies of 1,3-diaminopropane and its N-deuterated and N-ionised derivatives
Source: Royal Society of Chemistry journal article supplement (doi:10.1039/c7nj00810d), 2017-01-01
Supplement: c7nj00810d1.pdf [file c7nj00810d1.pdf]

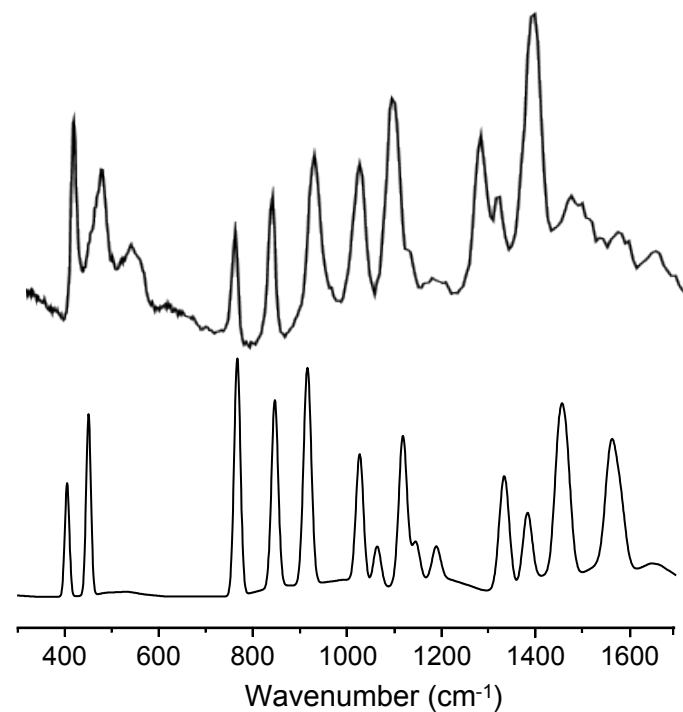

Figure S1 – Experimental INS (100-1650 cm<sup>-1</sup>) spectrum of pure 1,3-diaminopropane in the solid phase (top) and the mPW1PW/6-31G(d) calculated spectrum for the major TTTT conformer (bottom).
