# Supplementary material for: Vibrational and conformational studies of 1,3-diaminopropane and its N-deuterated and N-ionised derivatives
Source: Royal Society of Chemistry journal article supplement (doi:10.1039/c7nj00810d), 2017-01-01
Supplement: c7nj00810d3.pdf [file c7nj00810d3.pdf]

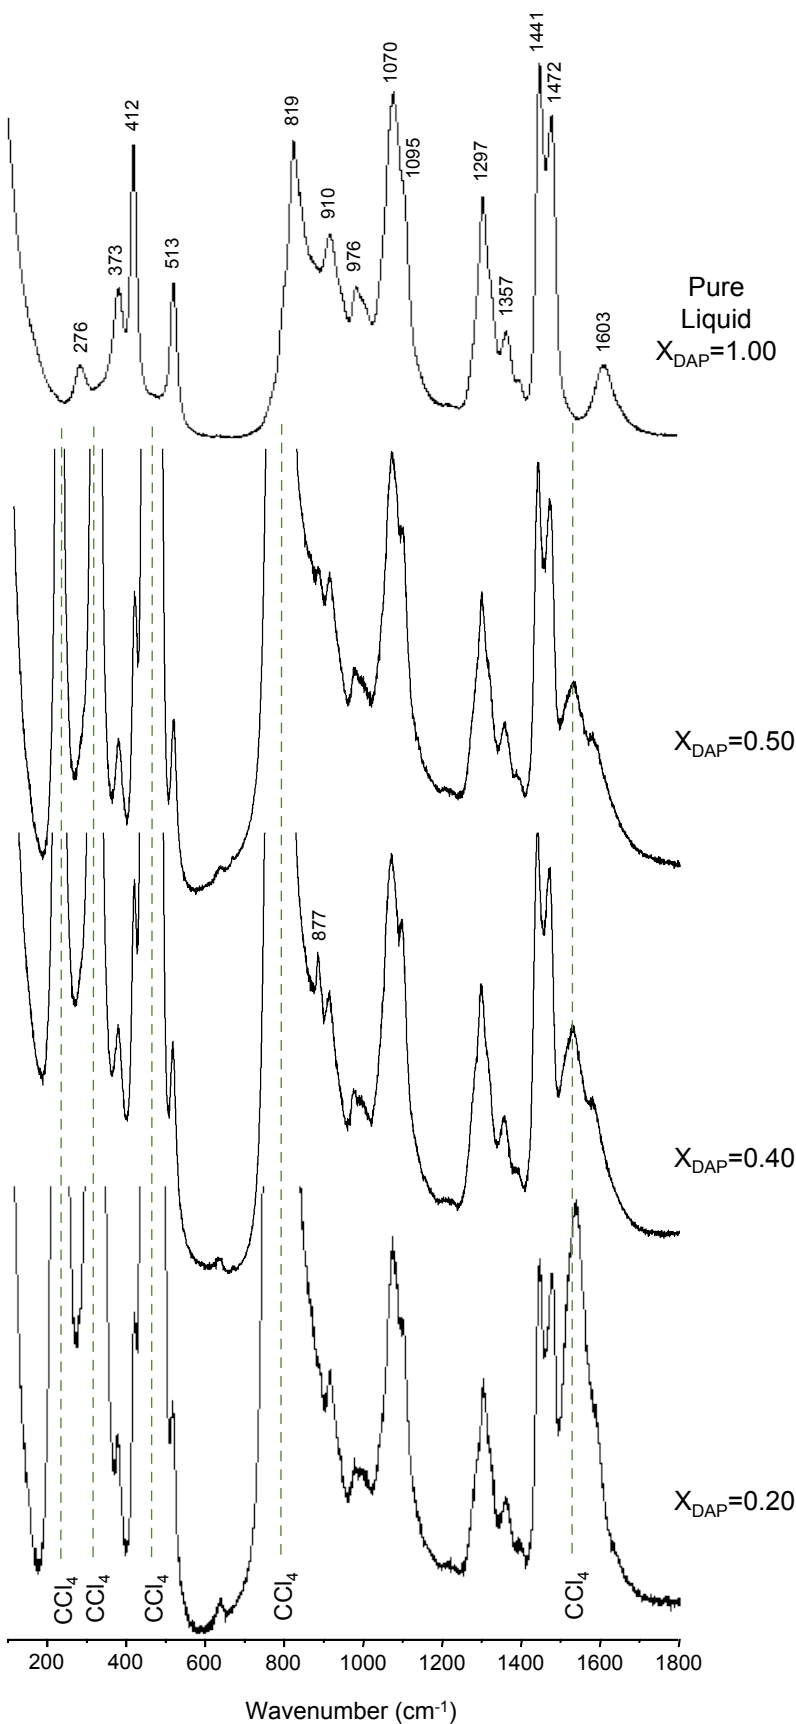

Figure S3 - Raman (100-1800 cm<sup>-1</sup>) spectra of pure 1,3-diaminopropane in the liquid phase (top) and of 1,3-diaminopropane/ $\text{CCl}_4$  solutions at different molar fractions.
